# Supplementary material for: Public and Private Information Sharing under “New Normal” of COVID-19: Understanding the Roles of Habit and Outcome Expectation
Source: MDPI journal article supplement (doi:10.3390/ijerph19095552), 2022-05-03
Supplement: s1 [file s1]

## Supplementary material: Materials and main items of the questionnaire.

### Part I

#### Stimulus material 1:

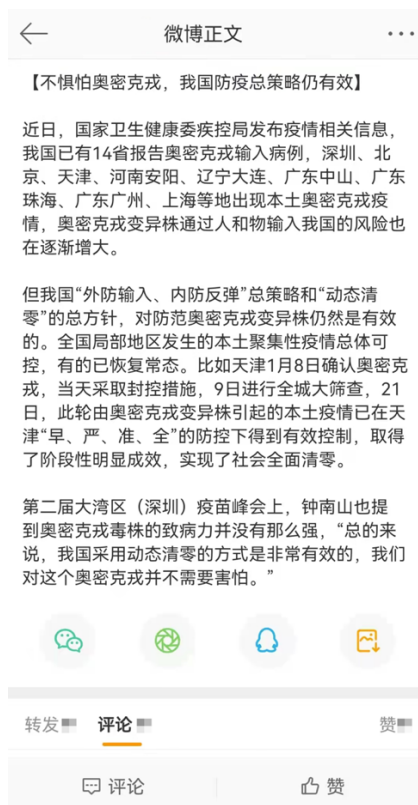

#### 【Don't be afraid of the Omicron: Chinese regular prevention is still effective】

The National Health Commission of the People's Republic of China recently released relevant information on the COVID-19 epidemic. Data shows that fourteen provinces in the China mainland have reported imported cases of Omicron. The regions include Shenzhen, Beijing, Tianjin, Anyang in Henan, Dalian in Liaoning, Zhongshan in Guangdong, Zhuhai in Guangdong, Guangzhou in Guangdong, Shanghai, etc. With the emergence of the Omicron case, the risk of Omicron variants being imported into our country through people and things is gradually increasing.

However, Chinese regular prevention that consists of "preventing inbound cases and domestic resurgence" and "dynamic clearance" is still effective. The local clustered epidemics in regions are generally under control while some have returned to normal. For example, Tianjin confirmed Omicron on January 8, and took measures to block and control it on the same day. On the 9th, a city-wide screening was carried out. On the 21st, this round of local epidemic caused by the Omicron was controlled quickly and accurately, which has achieved part of results by completing clearance

At the 2nd Greater Bay Area (Shenzhen) Vaccine Summit, Zhong Nanshan also mentioned that the pathogenicity of the Omicron strain is not strong. He said, "In general, Chinese dynamic clearing method is very effective. We don't need to be afraid of this Omicron."

## Stimulus material 2:

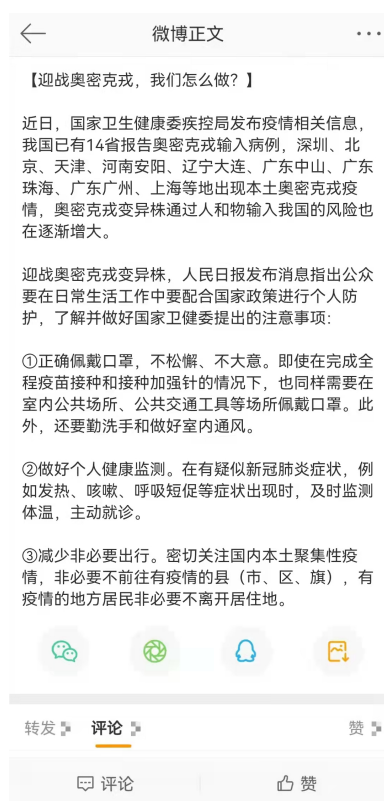

### 【What can we do to fight against the Omicron?】

The National Health Commission of the People's Republic of China recently released relevant information on the COVID-19 epidemic. Data shows that fourteen provinces in the China mainland have reported imported cases of Omicron. The regions include Shenzhen, Beijing, Tianjin, Anyang in Henan, Dalian in Liaoning, Zhongshan in Guangdong, Zhuhai in Guangdong, Guangzhou in Guangdong, Shanghai, etc. With the emergence of the Omicron case, the risk of Omicron variants being imported into our country through people and things is gradually increasing.

In the battle against the Omicron, the People's Daily issued a message stating that the public should cooperate with national policies for personal protection in their daily work. Following the advice from the National Health Commission of the People's Republic of China is necessary.

① Wear the mask correctly, be not slack or careless. Even after completing vaccination and the booster shot, it is also necessary to wear masks in indoor public places, public transportation, and other places. In addition, wash your hands frequently and do good indoor ventilation.

② Monitor personal health status. If you discover the suspected symptoms of the COVID-19, such as fever, cough, shortness of breath, and other symptoms, monitor the body temperature in time and seek medical treatment.

③ Reduce non-essential travel. Pay close attention to the local cluster epidemic in China, do not go to the regions with the epidemic unless necessary, and the residents of the place with the epidemic do not leave the place of residence unless necessary.

## Part II

(A seven-point Likert scale was employed, with 1 corresponding to strongly disagree, 7 strongly agree.)

### Public information sharing intention

● When I go through the above type of COVID-19-related information on Weibo and other social media, I am willing to publicly share it on Weibo and other social media.

|                          |                          |                          |                          |                          |                          |                          |
|--------------------------|--------------------------|--------------------------|--------------------------|--------------------------|--------------------------|--------------------------|
| <input type="checkbox"/> |
| 1                        | 2                        | 3                        | 4                        | 5                        | 6                        | 7                        |

● When I go through the above type of COVID-19-related information on Weibo and other social media, I am willing to publicly share it twice or more on Weibo and other social media.

|                          |                          |                          |                          |                          |                          |                          |
|--------------------------|--------------------------|--------------------------|--------------------------|--------------------------|--------------------------|--------------------------|
| <input type="checkbox"/> |
| 1                        | 2                        | 3                        | 4                        | 5                        | 6                        | 7                        |

● When I go through the above type of COVID-19-related information on Weibo and other social media, I am willing to publicly share it on multiple platforms.

|                          |                          |                          |                          |                          |                          |                          |
|--------------------------|--------------------------|--------------------------|--------------------------|--------------------------|--------------------------|--------------------------|
| <input type="checkbox"/> |
| 1                        | 2                        | 3                        | 4                        | 5                        | 6                        | 7                        |

● When I go through the above type of COVID-19-related information on Weibo and other social media, I am willing to publicly share it on Weibo and other social media to make as many people see it as possible.

|                          |                          |                          |                          |                          |                          |                          |
|--------------------------|--------------------------|--------------------------|--------------------------|--------------------------|--------------------------|--------------------------|
| <input type="checkbox"/> |
| 1                        | 2                        | 3                        | 4                        | 5                        | 6                        | 7                        |

### Private information sharing intention

● When I go through the above type of COVID-19-related information on Weibo and other social media, I am willing to share it with my friends.

|                          |                          |                          |                          |                          |                          |                          |
|--------------------------|--------------------------|--------------------------|--------------------------|--------------------------|--------------------------|--------------------------|
| <input type="checkbox"/> |
| 1                        | 2                        | 3                        | 4                        | 5                        | 6                        | 7                        |

● When I go through the above type of COVID-19-related information on Weibo and other social media, I am willing to share it with others who are in a one-to-one chat with me.

|                          |                          |                          |                          |                          |                          |                          |
|--------------------------|--------------------------|--------------------------|--------------------------|--------------------------|--------------------------|--------------------------|
| <input type="checkbox"/> |
| 1                        | 2                        | 3                        | 4                        | 5                        | 6                        | 7                        |

- When I go through the above type of COVID-19-related information on Weibo and other social media, I am willing to share it on platforms such as Moments that limits range of information flow.

|                          |                          |                          |                          |                          |                          |                          |
|--------------------------|--------------------------|--------------------------|--------------------------|--------------------------|--------------------------|--------------------------|
| <input type="checkbox"/> |
| 1                        | 2                        | 3                        | 4                        | 5                        | 6                        | 7                        |

- When I go through the above type of COVID-19-related information on Weibo and other social media, I am willing to share it with familiar people including families, friends and so on.

|                          |                          |                          |                          |                          |                          |                          |
|--------------------------|--------------------------|--------------------------|--------------------------|--------------------------|--------------------------|--------------------------|
| <input type="checkbox"/> |
| 1                        | 2                        | 3                        | 4                        | 5                        | 6                        | 7                        |

### Habit

- I always share the COVID-19-related information as a habit.

|                          |                          |                          |                          |                          |                          |                          |
|--------------------------|--------------------------|--------------------------|--------------------------|--------------------------|--------------------------|--------------------------|
| <input type="checkbox"/> |
| 1                        | 2                        | 3                        | 4                        | 5                        | 6                        | 7                        |

- Sharing the COVID-19-related information is natural to me.

|                          |                          |                          |                          |                          |                          |                          |
|--------------------------|--------------------------|--------------------------|--------------------------|--------------------------|--------------------------|--------------------------|
| <input type="checkbox"/> |
| 1                        | 2                        | 3                        | 4                        | 5                        | 6                        | 7                        |

- Sharing the COVID-19-related information is automatic to me.

|                          |                          |                          |                          |                          |                          |                          |
|--------------------------|--------------------------|--------------------------|--------------------------|--------------------------|--------------------------|--------------------------|
| <input type="checkbox"/> |
| 1                        | 2                        | 3                        | 4                        | 5                        | 6                        | 7                        |

- I often subconsciously share the COVID-19 information.

|                          |                          |                          |                          |                          |                          |                          |
|--------------------------|--------------------------|--------------------------|--------------------------|--------------------------|--------------------------|--------------------------|
| <input type="checkbox"/> |
| 1                        | 2                        | 3                        | 4                        | 5                        | 6                        | 7                        |

### Information seeking outcome expectation

- When I share the COVID-19-related information, I want to obtain useful information from others' feedback.

|                          |                          |                          |                          |                          |                          |                          |
|--------------------------|--------------------------|--------------------------|--------------------------|--------------------------|--------------------------|--------------------------|
| <input type="checkbox"/> |
| 1                        | 2                        | 3                        | 4                        | 5                        | 6                        | 7                        |

- When I share the COVID-19-related information, other people will tell me what they know about these risks too.

|                          |                          |                          |                          |                          |                          |                          |
|--------------------------|--------------------------|--------------------------|--------------------------|--------------------------|--------------------------|--------------------------|
| <input type="checkbox"/> |
| 1                        | 2                        | 3                        | 4                        | 5                        | 6                        | 7                        |

- When I share the COVID-19-related information, other people will exchange relevant information with me.

|                          |                          |                          |                          |                          |                          |                          |
|--------------------------|--------------------------|--------------------------|--------------------------|--------------------------|--------------------------|--------------------------|
| <input type="checkbox"/> |
| 1                        | 2                        | 3                        | 4                        | 5                        | 6                        | 7                        |

- When I share the COVID-19-related information, I expect that other people share such information with me in the future.

|                          |                          |                          |                          |                          |                          |                          |
|--------------------------|--------------------------|--------------------------|--------------------------|--------------------------|--------------------------|--------------------------|
| <input type="checkbox"/> |
| 1                        | 2                        | 3                        | 4                        | 5                        | 6                        | 7                        |

#### Emotion regulation outcome expectation

- Sharing the COVID-19-related information can alleviate my negative emotions.

|                          |                          |                          |                          |                          |                          |                          |
|--------------------------|--------------------------|--------------------------|--------------------------|--------------------------|--------------------------|--------------------------|
| <input type="checkbox"/> |
| 1                        | 2                        | 3                        | 4                        | 5                        | 6                        | 7                        |

- Sharing the COVID-19-related information can bring a sense of relief to me.

|                          |                          |                          |                          |                          |                          |                          |
|--------------------------|--------------------------|--------------------------|--------------------------|--------------------------|--------------------------|--------------------------|
| <input type="checkbox"/> |
| 1                        | 2                        | 3                        | 4                        | 5                        | 6                        | 7                        |

- Sharing the COVID-19-related information can make me feel positive.

|                          |                          |                          |                          |                          |                          |                          |
|--------------------------|--------------------------|--------------------------|--------------------------|--------------------------|--------------------------|--------------------------|
| <input type="checkbox"/> |
| 1                        | 2                        | 3                        | 4                        | 5                        | 6                        | 7                        |

- Sharing the COVID-19-related information can help me regulate emotions.

|                          |                          |                          |                          |                          |                          |                          |
|--------------------------|--------------------------|--------------------------|--------------------------|--------------------------|--------------------------|--------------------------|
| <input type="checkbox"/> |
| 1                        | 2                        | 3                        | 4                        | 5                        | 6                        | 7                        |

#### Altruism outcome expectation

- Sharing the COVID-19-related information can warn others of risk.

|                          |                          |                          |                          |                          |                          |                          |
|--------------------------|--------------------------|--------------------------|--------------------------|--------------------------|--------------------------|--------------------------|
| <input type="checkbox"/> |
| 1                        | 2                        | 3                        | 4                        | 5                        | 6                        | 7                        |

- Sharing the COVID-19-related information can save others from risk.

|                          |                          |                          |                          |                          |                          |                          |
|--------------------------|--------------------------|--------------------------|--------------------------|--------------------------|--------------------------|--------------------------|
| <input type="checkbox"/> |
| 1                        | 2                        | 3                        | 4                        | 5                        | 6                        | 7                        |

- Sharing the COVID-19-related information can keep others updated.

|                          |                          |                          |                          |                          |                          |                          |
|--------------------------|--------------------------|--------------------------|--------------------------|--------------------------|--------------------------|--------------------------|
| <input type="checkbox"/> |
| 1                        | 2                        | 3                        | 4                        | 5                        | 6                        | 7                        |

- Sharing the COVID-19-related information can satisfy other's interest.

|                          |                          |                          |                          |                          |                          |                          |
|--------------------------|--------------------------|--------------------------|--------------------------|--------------------------|--------------------------|--------------------------|
| <input type="checkbox"/> |
| 1                        | 2                        | 3                        | 4                        | 5                        | 6                        | 7                        |

### Public engagement outcome expectation

- Sharing the COVID-19-related information can make it attract more attention.

|                          |                          |                          |                          |                          |                          |                          |
|--------------------------|--------------------------|--------------------------|--------------------------|--------------------------|--------------------------|--------------------------|
| <input type="checkbox"/> |
| 1                        | 2                        | 3                        | 4                        | 5                        | 6                        | 7                        |

- Sharing the COVID-19-related information can contribute to more public discussion.

|                          |                          |                          |                          |                          |                          |                          |
|--------------------------|--------------------------|--------------------------|--------------------------|--------------------------|--------------------------|--------------------------|
| <input type="checkbox"/> |
| 1                        | 2                        | 3                        | 4                        | 5                        | 6                        | 7                        |

- Sharing the COVID-19-related information can promote concern for public opinion and help to solve specific problems.

|                          |                          |                          |                          |                          |                          |                          |
|--------------------------|--------------------------|--------------------------|--------------------------|--------------------------|--------------------------|--------------------------|
| <input type="checkbox"/> |
| 1                        | 2                        | 3                        | 4                        | 5                        | 6                        | 7                        |

- Sharing the COVID-19-related information can be an important way to express my opinion as a public.

|                          |                          |                          |                          |                          |                          |                          |
|--------------------------|--------------------------|--------------------------|--------------------------|--------------------------|--------------------------|--------------------------|
| <input type="checkbox"/> |
| 1                        | 2                        | 3                        | 4                        | 5                        | 6                        | 7                        |

### Part III

- Your gender: \_\_\_\_\_
- Your age: \_\_\_\_\_
- Your education level: \_\_\_\_\_
- Your disposable income per month: \_\_\_\_\_
- Your occupation: \_\_\_\_\_
- What is your condition of COVID-19 vaccinations?
  - ☐ Not vaccinated.
  - ☐ At least one shot vaccinated except the booster shot.
  - ☐ Vaccinated including the booster shot.
- Have you or people close to you ever been in high or medium risk regions?
  - ☐ Yes.
  - ☐ No.
- Have you or people close to you ever undergone quarantine and medical observation?
  - ☐ Yes.
  - ☐ No.
- Have you or people close to you ever been diagnosed with COVID-19?
  - ☐ Yes.
  - ☐ No.
